# Supplementary material for: Selective inhibition of low-affinity memory CD8+ T cells by corticosteroids
Source: PubMed Central journal article supplement — J Exp Med. 2019 Sep 19;216(12):2701–13. doi: 10.1084/jem.20190738 (PMC6888983; doi:10.1084/jem.20190738), 2019-09-19
Supplement: JEM_20190738_sm.pdf [file JEM_20190738_sm.pdf]

## Supplemental material

Tokunaga et al., <https://doi.org/10.1084/jem.20190738>

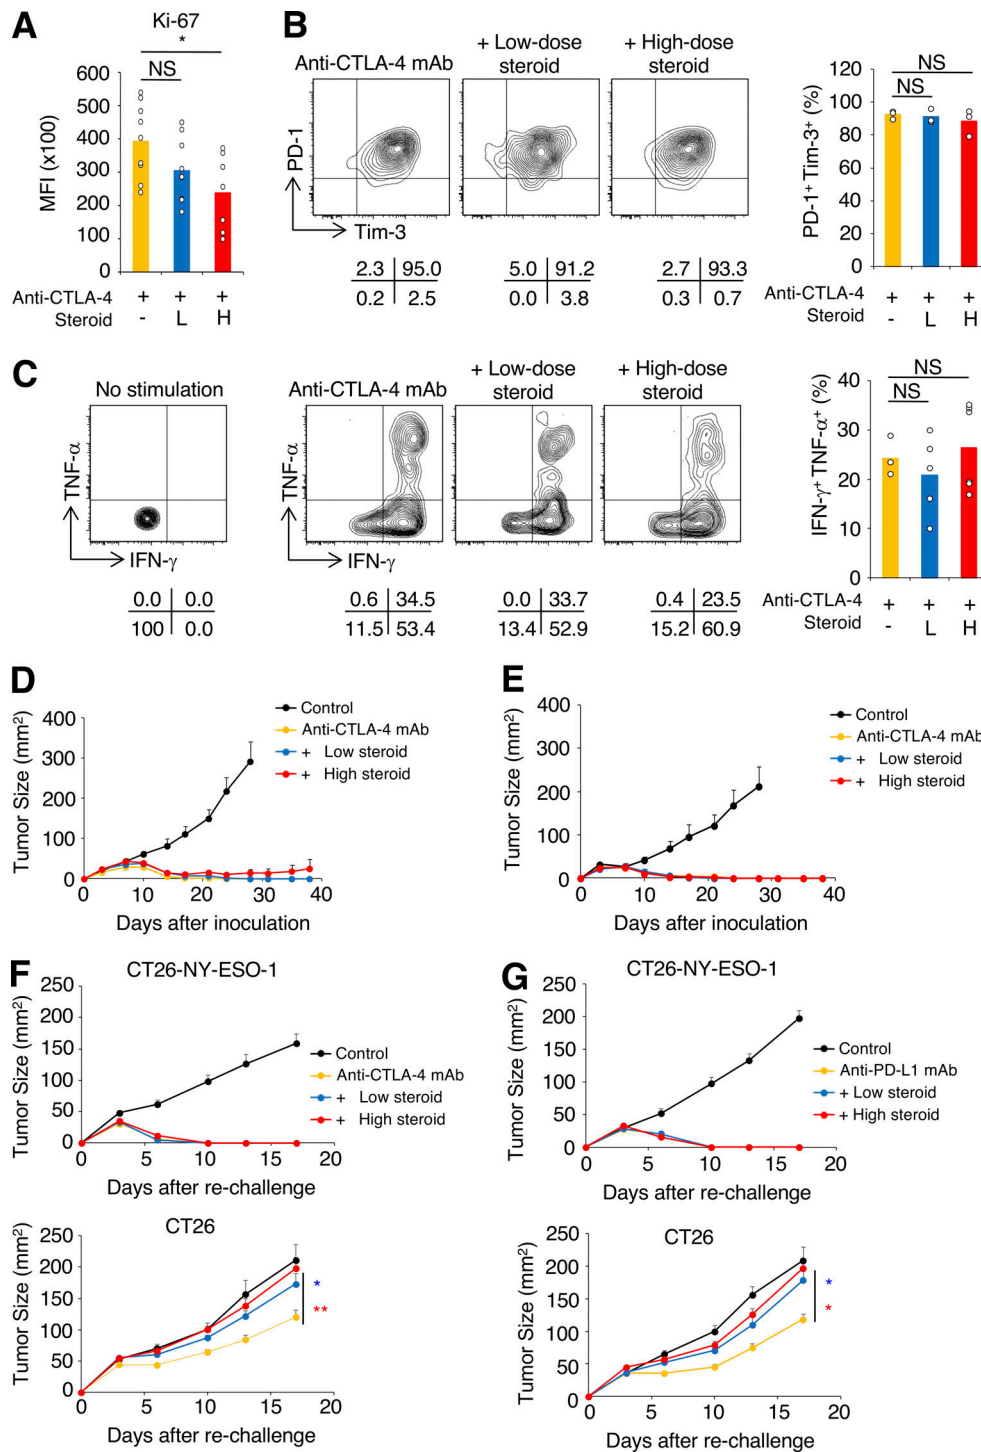

Figure S1. **Early corticosteroid treatment reduces antitumor activity and impairs low-affinity memory T cell differentiation.** (A) Ki-67 expression by NY-ESO-1 tetramer<sup>+</sup>CD8<sup>+</sup> T cells in CMS5a-NY-ESO-1 tumors at 10 d after tumor inoculation ( $n = 7-9$ ). MFI, mean fluorescence intensity. L, low dose; H, high dose. (B) Representative flow-cytometric analysis (left) and summary (right) of PD-1 and Tim-3 expression on NY-ESO-1-tetramer<sup>+</sup>CD8<sup>+</sup> T cells in CMS5a-NY-ESO-1 tumors at 10 d after tumor inoculation ( $n = 3$ ). (C) Representative flow cytometry (left) and summary (right) of IFN- $\gamma$  and TNF- $\alpha$  production by NY-ESO-1-tetramer<sup>+</sup>CD8<sup>+</sup> T cells in CMS5a-NY-ESO-1 tumors at 10 d after tumor inoculation ( $n = 4-6$ ). (D and E) Tumor growth curves of early (D) and late (E) corticosteroid treatment. BALB/c mice were inoculated with CT26-NY-ESO-1 and injected with anti-CTLA-4 mAb on days 3, 6, and 9 after tumor inoculation. Corticosteroid administration was started on the same day (D) or on day 17 (E) of anti-CTLA-4 mAb ( $n = 4-10$ ). (F) Tumor growth curves (upper: CT26-NY-ESO-1; lower: CT26) of rechallenge to early corticosteroid-treated mice. CT26-NY-ESO-1-bearing mice were treated as in (D). Mice that had completely rejected the initial tumors were secondarily inoculated with CT26-NY-ESO-1 and parental CT26 (day 39;  $n = 5-10$ ). (G) Tumor growth curves (upper: CT26-NY-ESO-1; lower: CT26) of rechallenge to early corticosteroid-treated mice. CT26-NY-ESO-1-bearing mice were treated as in Fig. 2 A. Mice that had completely rejected the initial tumors were inoculated with CT26-NY-ESO-1 and parental CT26 (day 39;  $n = 5-9$ ). Data in D-G are mean + SE. Statistical analysis by Dunnett's test; \*,  $P < 0.05$ ; \*\*,  $P < 0.01$ . These experiments were performed independently three times with similar results.

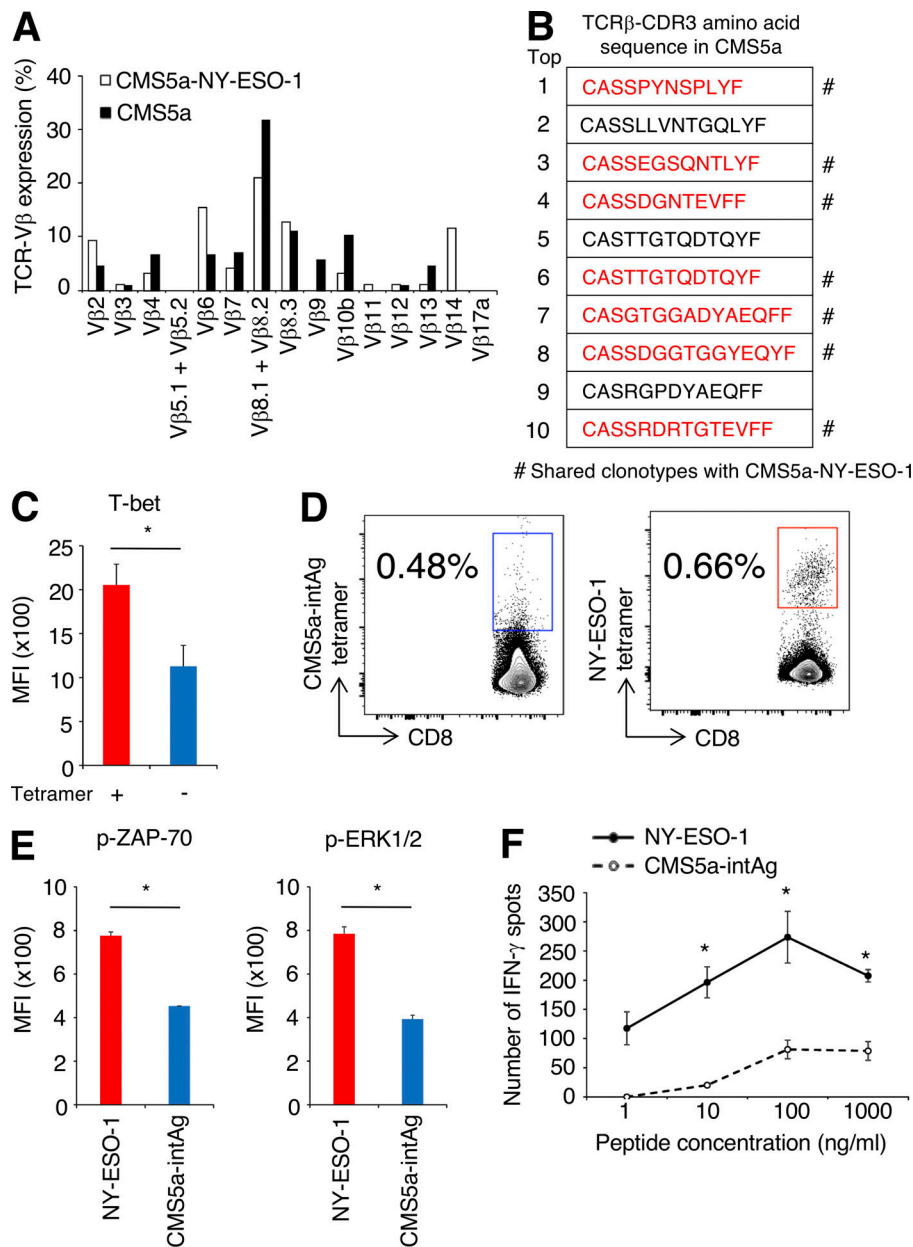

Figure S2. **CMS5a-intAg-specific CD8<sup>+</sup> T cells have low-affinity TCR.** (A) Comparison of TCR repertoires expressed by NY-ESO-1-tetramer<sup>-</sup>CD69<sup>+</sup>CD8<sup>+</sup> T cells. (B) TCR v $\beta$ -repertoire analysis of NY-ESO-1-tetramer<sup>-</sup>CD69<sup>+</sup>CD8<sup>+</sup> T cells. Shared top 10 clonotypes of CD69<sup>+</sup>CD8<sup>+</sup> T cells in CMS5a tumors and all clonotypes of NY-ESO-1-tetramer<sup>-</sup>CD69<sup>+</sup>CD8<sup>+</sup> T cells in CMS5a-NY-ESO-1 tumors were analyzed. BALB/c mice were inoculated with CMS5a-NY-ESO-1 or CMS5a, and administered with anti-CTLA-4 mAb on days 3, 6, and 9 after tumor inoculation. TCR repertoires were examined at 10 d after tumor inoculation ( $n = 4$ ). (C) T-bet expression in NY-ESO-1-tetramer<sup>+</sup> or NY-ESO-1-tetramer<sup>-</sup> CD69<sup>+</sup>CD8<sup>+</sup> T cells in CMS5a-NY-ESO-1 tumors at 10 d after tumor inoculation ( $n = 3$ ). MFI, mean fluorescence intensity. (D) NY-ESO-1- or CMS5a-intAg-specific CD8<sup>+</sup> T cell induction. Mice were immunized with NY-ESO-1 peptide (RGPE SRL) or CMS5a-intAg peptide (QYIHSANVL) 100  $\mu$ g/mouse by CASAC-vaccination. Cells from draining lymph nodes in the immunized mice on day 16 after two vaccinations (day 0 and day 10) were stained with MHC/peptide dextramers and analyzed with flow cytometry. (E) Phosphorylation of TCR signaling molecules in NY-ESO-1- and CMS5a-intAg-specific CD8<sup>+</sup> T cells. NY-ESO-1-specific and CMS5a-intAg-specific CD8<sup>+</sup> T cells were cultured with P1.HTR pulsed with cognate peptides with/without corticosteroids (25 ng/ml). Phosphorylation of ZAP-70 (left) and ERK1/2 (right) was determined by flow cytometry ( $n = 3$ ). (F) IFN- $\gamma$  secretion by NY-ESO-1- and CMS5a-intAg-specific CD8<sup>+</sup> T cells. NY-ESO-1-specific and CMS5a-intAg-specific CD8<sup>+</sup> T cells were cultured with antigen-presenting cells (CD90-negative splenocytes) pulsed with cognate peptides. The number of IFN- $\gamma$ -secreting Ag-specific CD8<sup>+</sup> T cells was assessed by ELISPOT assays ( $n = 3$ ). Data in C, E, and F are mean  $\pm$  SD. Statistical analysis by Student's  $t$  test; \*,  $P < 0.05$ . These experiments were performed independently three times with similar results.

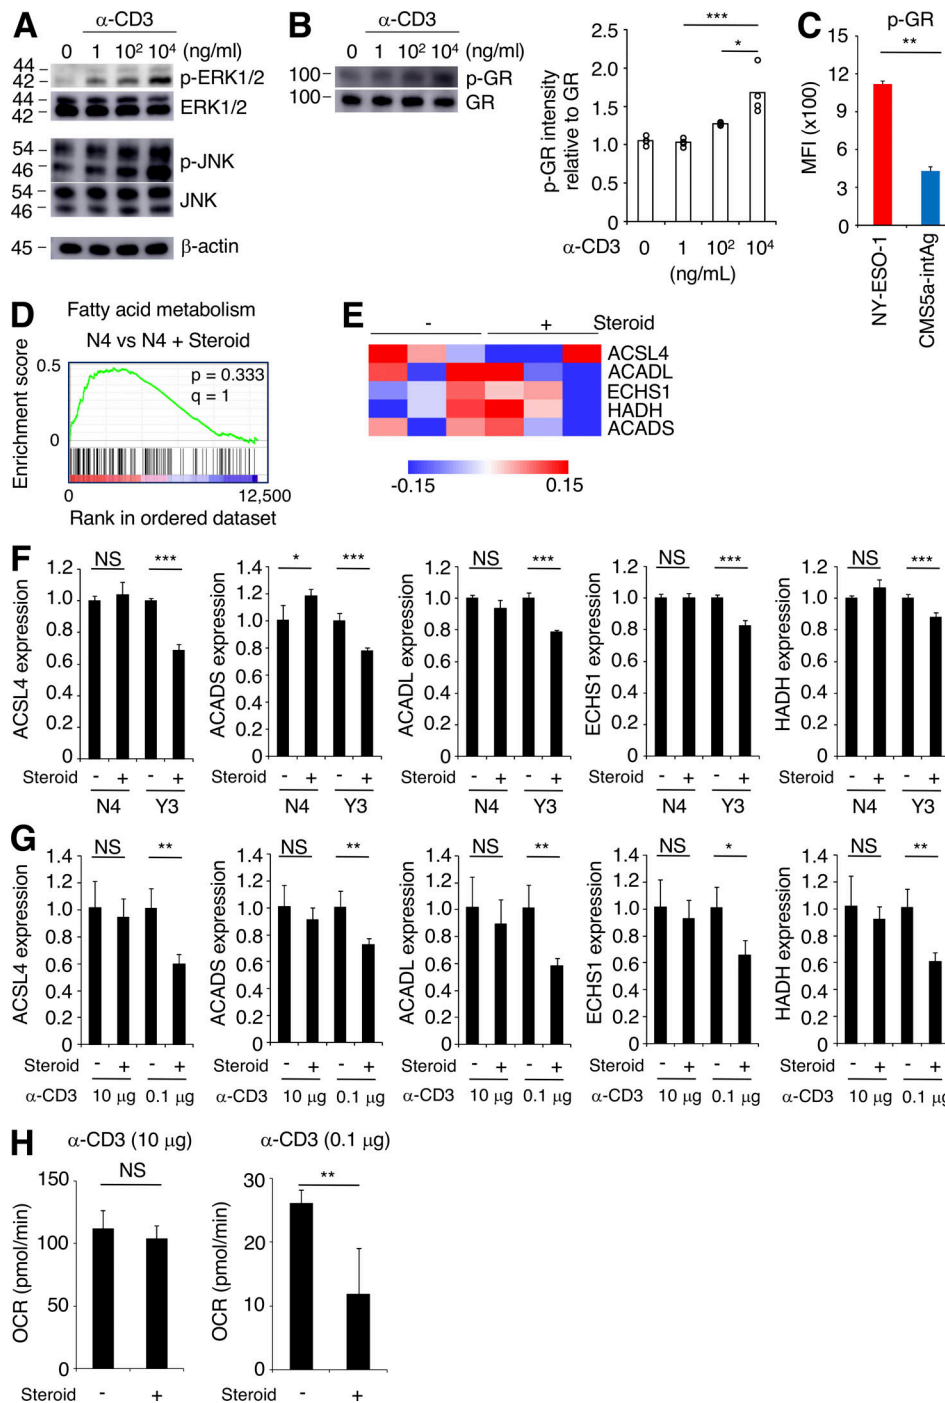

Figure S3. **Corticosteroids compromise FAO in low-affinity but not high-affinity memory T cells.** (A) Phosphorylation of TCR signaling molecules by immunoblot. CD8<sup>+</sup> T cells were stimulated with titrated doses of anti-CD3 mAb. Phosphorylation of ERK1/2 and JNK was determined by immunoblot. (B) Phosphorylation of GR. CD8<sup>+</sup> T cells were stimulated with titrated doses of anti-CD3 mAb. Phosphorylation of GR was determined by immunoblot (right: relative levels of phosphorylated GR protein). Protein levels were normalized with total GR signal (*n* = 4). (C) Phosphorylation of GR in NY-ESO-1- and CMS5a-intAg antigen-specific CD8<sup>+</sup> T cells. NY-ESO-1-specific and CMS5a-intAg-specific CD8<sup>+</sup> T cells were cultured with P1.HTR pulsed with cognate peptides with/without corticosteroids (25 ng/ml). Phosphorylation of GR was determined by flow cytometry (*n* = 3). (D) GSEA of fatty acid metabolism-related genes in N4-stimulated OT-I cells relative to those treated with corticosteroids. (E) Heat map of expression of FAO-related genes. OT-I cells were stimulated with N4 peptide, and treated with corticosteroids in vitro for 4 d. mRNA expression was examined with microarray. (F) FAO-related mRNA expression in OT-I cells. OT-I cells were stimulated with N4 or Y3 peptide, and treated with corticosteroids in vitro for 4 d. mRNA expression was determined by quantitative PCR (*n* = 3). (G) FAO-related mRNA expression in CD8<sup>+</sup> T cells activated by anti-CD3 mAb. CD8<sup>+</sup> T cells were stimulated with anti-CD3 mAb, and treated with corticosteroids in vitro for 4 d. mRNA expression was determined by quantitative PCR (*n* = 3). (H) OCR of anti-CD3 mAb-stimulated CD8<sup>+</sup> T cells with etomoxir. CD8<sup>+</sup> T cells were stimulated as described. FAO was determined with etomoxir by measuring OCR using extracellular flux analyzer (*n* = 4, 5). Data in C, F, G, and H are mean + SD. Statistical analysis by Dunnett's test (B) or Student's *t* test (C, F, G, and H); \*, *P* < 0.05; \*\*, *P* < 0.01; \*\*\*, *P* < 0.001. These experiments were performed independently three times with similar results.
